# Supplementary material
Source: PubMed Central journal article supplement (PMC6823410)
Supplement: 10815_2019_1549_MOESM1_ESM.pdf [file 10815_2019_1549_MOESM1_ESM.pdf]

Title: Advanced paternal age does not affect embryo aneuploidy in egg donor cycles  
 Journal of Assisted Reproduction and Genetics

| Chromosome | Trend for Aneuploid Condition with Advancing Paternal Age |                 |                 |                                  |
|------------|-----------------------------------------------------------|-----------------|-----------------|----------------------------------|
|            | <i>Any</i>                                                | <i>Monosomy</i> | <i>Trisomy</i>  | <i>Duplication/<br/>Deletion</i> |
| 1          | 0.6246                                                    | 0.06147         | 0.1772          | 0.09152                          |
| 2          | <b>0.03154</b>                                            | 0.122           | 0.4827          | 0.1411                           |
| 3          | 0.8876                                                    | 0.5671          | 0.9003          | 0.3986                           |
| 4          | 0.7367                                                    | 0.1009          | 0.6865          | 0.515                            |
| 5          | 0.6663                                                    | 0.3706          | 0.7108          | 0.5956                           |
| 6          | 0.7733                                                    | 0.936           | 0.6747          | 0.313                            |
| 7          | 0.1781                                                    | 0.881           | 0.1323          | 0.4858                           |
| 8          | 0.7596                                                    | 0.8606          | 0.2318          | 0.6252                           |
| 9          | 0.4577                                                    | 0.1882          | <b>0.009481</b> | 0.68                             |
| 10         | 0.792                                                     | 0.7235          | 0.4088          | 0.6893                           |
| 11         | 0.7229                                                    | 0.6831          | 0.8814          | 0.3947                           |
| 12         | 0.7011                                                    | 0.8814          | 0.1956          | 0.3432                           |
| 13         | 0.8608                                                    | 0.4626          | 0.3973          | 0.4081                           |
| 14         | 0.773                                                     | 0.8864          | 0.3548          | 0.4547                           |
| 15         | 0.9365                                                    | 0.4272          | 0.9814          | 0.09987                          |
| 16         | <b>0.01045</b>                                            | 0.053           | <b>0.04897</b>  | 0.772                            |
| 17         | 0.3964                                                    | 0.8133          | 0.5919          | 0.2261                           |
| 18         | 0.2533                                                    | 0.09611         | 0.7619          | 0.9123                           |
| 19         | 0.9981                                                    | 0.6894          | 0.2745          | <b>0.001806</b>                  |
| 20         | 0.6878                                                    | 0.7352          | 0.4793          | 0.9379                           |
| 21         | 0.503                                                     | 0.5457          | 0.831           | 0.3592                           |
| 22         | 0.6449                                                    | 0.9025          | 0.4603          | 0.2175                           |
| XY         | 0.118                                                     | 0.3667          | 0.2801          | 0.3838                           |
